# Supplementary material for: Efficiency of Lactiplantibacillus plantarum JT-PN39 and Paenibacillus motobuensis JT-A29 for Fermented Coffee Applications and Fermented Coffee Characteristics
Source: MDPI journal article supplement (doi:10.3390/foods12152894), 2023-07-29
Supplement: s1 [file s1]

**Table S1.** Non-volatile compounds in roasted coffee examination by LC-MS.

| Non-volatile     | Molecular<br>formula                            | MW<br>(g/mol) | t <sub>R</sub> (min) | Area x10 <sup>5</sup> |               |           |                  |                |                  |
|------------------|-------------------------------------------------|---------------|----------------------|-----------------------|---------------|-----------|------------------|----------------|------------------|
|                  |                                                 |               |                      | OC                    | C             | PM        | LP               | PM+LP          | CC               |
| Trigonelline     | C <sub>7</sub> H <sub>7</sub> NO <sub>2</sub>   | 136.0404      | 8.40                 | 4.130                 | 7.160         | 5.530     | <b>6.950</b>     | 5.210          | 5.920            |
| Chlorogenic acid | C <sub>16</sub> H <sub>18</sub> O <sub>9</sub>  | 353.0879      | 9.42                 | 1,100.000             | 1,820.000     | 1,870.000 | <b>2,230.000</b> | 2,010.000      | 1,360.000        |
| Ferulic acid     | C <sub>10</sub> H <sub>10</sub> O <sub>4</sub>  | 193.0505      | 11.93                | 6.690                 | 7.790         | 7.240     | <b>8.310</b>     | 5.560          | 7.880            |
| Quinic acid      | C <sub>7</sub> H <sub>12</sub> O <sub>6</sub>   | 191.0561      | 1.38                 | 2,280.000             | 2,280.000     | 1,870.000 | 2,010.000        | 1,780.000      | <b>2,300.000</b> |
| Malic acid       | C <sub>4</sub> H <sub>6</sub> O <sub>5</sub>    | 133.0143      | 1.74                 | 222.000               | 247.000       | 183.000   | <b>276.000</b>   | <b>272.000</b> | 344.000          |
| Lactic acid      | C <sub>3</sub> H <sub>6</sub> O <sub>3</sub>    | 89.02402      | 1.77                 | 111.000               | 158.000       | 516.000   | <b>1,830.000</b> | 1,390.000      | 130.000          |
| Citric acid      | C <sub>6</sub> H <sub>8</sub> O <sub>7</sub>    | 191.0198      | 1.92                 | -                     | 16.000        | 0.558     | 53.400           | 31.900         | <b>181.000</b>   |
| Tartaric acid    | C <sub>4</sub> H <sub>6</sub> O <sub>6</sub>    | 149.0091      | 1.75                 | 0.130                 | <b>0.262</b>  | -         | 0.116            | 0.028          | 0.111            |
| Oxalic acid      | C <sub>2</sub> H <sub>2</sub> O <sub>4</sub>    | 88.9876       | 1.74                 | <b>14.800</b>         | 7.960         | 12.300    | 12.200           | 12.700         | 13.700           |
| Citramalic acid  | C <sub>5</sub> H <sub>8</sub> O <sub>5</sub>    | 147.0299      | 1.56                 | 16.800                | <b>43.900</b> | 1.200     | 22.300           | 9.590          | 26.900           |
| Glutamic acid    | C <sub>5</sub> H <sub>9</sub> NO <sub>4</sub>   | 146.0458      | 1.77                 | 0.713                 | 1.040         | 1.120     | 1.240            | <b>1.680</b>   | 0.828            |
| Succinic acid    | C <sub>4</sub> H <sub>6</sub> O <sub>4</sub>    | 117.0194      | 2.11                 | 17.900                | 50.300        | 22.600    | <b>182.000</b>   | 51.300         | 33.500           |
| Sucrose          | C <sub>12</sub> H <sub>22</sub> O <sub>11</sub> | 341.1089      | 1.39                 | 38.100                | 36.700        | 19.600    | 29.900           | 19.000         | <b>45.900</b>    |
| Fructose         | C <sub>6</sub> H <sub>12</sub> O <sub>6</sub>   | 179.0561      | 1.55                 | <b>139.000</b>        | 45.500        | 93.800    | 50.900           | 41.900         | 108.000          |
| Catechins        | C <sub>15</sub> H <sub>14</sub> O <sub>6</sub>  | 289.0719      | 10.79                | 3.660                 | 8.820         | 5.720     | <b>9.210</b>     | 5.800          | 6.840            |

**Table S1.** (continued)

| Non-volatile               | Molecular<br>formula                                        | MW<br>(g/mol) | t <sub>R</sub> (min) | Area x10 <sup>5</sup> |               |               |               |               |              |
|----------------------------|-------------------------------------------------------------|---------------|----------------------|-----------------------|---------------|---------------|---------------|---------------|--------------|
|                            |                                                             |               |                      | OC                    | C             | PM            | LP            | PM+LP         | CC           |
| Quercetin                  | C <sub>15</sub> H <sub>10</sub> O <sub>7</sub>              | 301.0354      | 1.46                 | 0.106                 | <b>0.166</b>  | 0.127         | 0.165         | 0.304         | -            |
| 1,3-Dicaffeoylquinic acid  | C <sub>25</sub> H <sub>24</sub> O <sub>12</sub>             | 515.1196      | 11.97                | 2.340                 | <b>11.900</b> | 0.457         | 7.650         | 8.380         | 8.150        |
| Niacin (Nicotinic acid)    | C <sub>6</sub> H <sub>5</sub> NO <sub>2</sub>               | 122.0247      | 1.34                 | 12.100                | 12.700        | <b>16.600</b> | 15.900        | 14.500        | 11.100       |
| Theophylline               | C <sub>7</sub> H <sub>8</sub> N <sub>4</sub> O <sub>2</sub> | 179.0575      | 7.02                 | 0.123                 | 0.564         | 0.339         | <b>0.458</b>  | 0.319         | 0.341        |
| Shikimic acid              | C <sub>7</sub> H <sub>10</sub> O <sub>5</sub>               | 173.0454      | 1.42                 | 33.200                | 16.800        | 18.600        | <b>43.100</b> | 40.900        | 18.300       |
| Beta-D-galacturonic acid   | C <sub>6</sub> H <sub>10</sub> O <sub>7</sub>               | 193.0351      | 1.41                 | 2.360                 | 9.280         | 13.600        | 14.100        | <b>14.500</b> | 5.240        |
| 3-Hydroxyanthranilic acid  | C <sub>7</sub> H <sub>7</sub> NO <sub>3</sub>               | 152.0353      | 9.29                 | 21.300                | 42.600        | 71.200        | 54.400        | <b>47.600</b> | 23.200       |
| Chorismate                 | C <sub>10</sub> H <sub>10</sub> O <sub>6</sub>              | 225.0404      | 4.69                 | 0.526                 | 0.476         | 0.383         | 0.483         | 0.381         | <b>0.680</b> |
| Galactomannan              | C <sub>18</sub> H <sub>32</sub> O <sub>16</sub>             | 503.1620      | 1.40                 | 4.158                 | 3.856         | 3.486         | 4.560         | 3.264         | <b>5.110</b> |
| <i>Cafeic acid pathway</i> |                                                             |               |                      |                       |               |               |               |               |              |
| L-Tyrosine                 | C <sub>9</sub> H <sub>11</sub> NO <sub>3</sub>              | 180.0667      | 11.84                | 2.290                 | 4.940         | 3.080         | 5.710         | 4.990         | <b>5.230</b> |
| N-Hydroxy-L-tyrosine       | C <sub>9</sub> H <sub>11</sub> NO <sub>4</sub>              | 197.0688      | 9.05                 | 1.870                 | 7.340         | 6.190         | <b>12.500</b> | 9.490         | 4.430        |
| 3-Coumaric acid            | C <sub>9</sub> H <sub>8</sub> O <sub>3</sub>                | 164.0473      | 11.13                | 3.880                 | 4.830         | <b>5.890</b>  | 5.100         | 5.660         | 4.120        |
| Cafeic acid                | C <sub>9</sub> H <sub>8</sub> O <sub>4</sub>                | 180.16        | 9.84                 | 26.500                | 64.000        | 57.600        | 63.700        | <b>64.800</b> | 44.100       |

**Table S1.** (continued)

| Non-volatile       | Molecular<br>formula                                         | MW<br>(g/mol) | t <sub>R</sub> (min) | Area x10 <sup>5</sup> |              |       |       |       |              |
|--------------------|--------------------------------------------------------------|---------------|----------------------|-----------------------|--------------|-------|-------|-------|--------------|
|                    |                                                              |               |                      | OC                    | C            | PM    | LP    | PM+LP | CC           |
| Caffeine pathway   |                                                              |               |                      |                       |              |       |       |       |              |
| Xanthosine         | C10H12N4O6                                                   | 283.0672      | 1.42                 | 0.119                 | <b>0.699</b> | 0.201 | 1.130 | 0.622 | 0.445        |
| 7-Methylxanthosine | C11H15N4O6                                                   | 298.0932      | 10.45                | 0.571                 | 2.720        | 3.270 | 5.120 | 4.340 | <b>0.955</b> |
| 7-Methylxanthine   | C6H6N4O2                                                     | 165.0405      | 1.58                 | 0.195                 | 0.116        | 0.476 | 0.101 | 0.287 | <b>0.684</b> |
| Theobromine        | C7H8N4O2                                                     | 179.0574      | 7.02                 | 0.081                 | <b>0.564</b> | 0.227 | 0.458 | 0.319 | 0.236        |
| Caffeine           | C <sub>8</sub> H <sub>10</sub> N <sub>4</sub> O <sub>2</sub> | 193.0731      | 1.42                 | <b>1.700</b>          | 1.620        | 0.339 | 0.741 | 0.491 | 1.610        |

Note: ordinary coffee (OC), control or non-fermentation (C; uninoculation), *P. motobuensis* JT-A29 (PM), *L. plantarum* JT-PN39 (LP), mixed starter cultures (PM+LP) fermented coffee and Civet coffee (CC).

**Table S2.** Volatile compounds in roasted coffee beans

| Compound                                            | Aroma                                                                | Group          | rt     | Total peak area percentage (%) |               |               |               |               |
|-----------------------------------------------------|----------------------------------------------------------------------|----------------|--------|--------------------------------|---------------|---------------|---------------|---------------|
|                                                     |                                                                      |                |        | OC                             | C             | LP            | PM+LP         | PM            |
| Acetic acid                                         | sour                                                                 | Acid           | 1.978  | 31.42                          | 31.49         | <b>59.92</b>  | 20.63         | 4.95          |
| Butanoic acid                                       | rancid butter, sour                                                  | Acid           | 2.824  | 0.00                           | 0.00          | 0.00          | <b>15.87</b>  | 0.00          |
| <b>Furfural</b>                                     | <b>almond, nutty, sweet, caramel, bread</b>                          | <b>Furans</b>  | 3.399  | 33.49                          | 44.01         | <b>68.37</b>  | 59.76         | <b>64.14</b>  |
| 2-Furanmethanol                                     | caramellic, burnt, smoky                                             | Alcohol        | 3.667  | <b>100.00</b>                  | <b>100.00</b> | 78.23         | <b>100.00</b> | <b>100.00</b> |
| Pyrazine, 2,5-dimethyl-                             | coffee, cocoa, nutty, roasted, grassy                                | Pyrazine       | 4.743  | 38.94                          | <b>63.17</b>  | 47.88         | 44.72         | 22.08         |
| <b>5-Methyl furfural</b>                            | <b>sweet, caramel, coffee</b>                                        | <b>Furans</b>  | 5.946  | 55.91                          | 54.92         | <b>100.00</b> | 59.66         | <b>66.13</b>  |
| Pyrazine, 2-ethyl-6-methyl-                         | roasted, hazelnut-like                                               | Pyrazine       | 6.907  | 0.00                           | <b>41.88</b>  | 0.00          | 34.76         | 0.00          |
| 3,5-Dimethylcyclohex-1-ene-4-carboxaldehyde         | floral                                                               | Aldehyde       | 9.326  | 1.17                           | 0.00          | <b>2.07</b>   | 0.00          | 0.00          |
| Pyrazine, 2-ethyl-3,5-dimethyl-                     | wheat bread, smoked fatty fish, roast chicken, roast beef, black tea | Pyrazine       | 9.499  | 6.15                           | <b>13.72</b>  | 7.50          | 5.38          | 11.96         |
| <b>Maltol</b>                                       | <b>caramel</b>                                                       | <b>Alcohol</b> | 10.672 | 7.25                           | 8.37          | <b>12.06</b>  | 10.05         | 9.05          |
| 4H-Pyran-4-one, 2,3-dihydro-3,5-dihydroxy-6-methyl- | caramel                                                              | Pyrans         | 11.839 | 0.00                           | 0.00          | 0.00          | 0.00          | <b>3.56</b>   |
| Pyrazine, 3,5-diethyl-2-methyl-                     | green and nutty                                                      | Pyrazine       | 12.483 | 0.00                           | <b>6.14</b>   | 0.00          | 0.00          | 0.00          |

**Table S2.** Volatile compounds in roasted coffee beans (continued)

| Compound                                                                               | Aroma                                                                                   | Group    | rt     | Total peak area percentage (%) |             |              |             |             |
|----------------------------------------------------------------------------------------|-----------------------------------------------------------------------------------------|----------|--------|--------------------------------|-------------|--------------|-------------|-------------|
|                                                                                        |                                                                                         |          |        | OC                             | C           | LP           | PM+LP       | PM          |
| 1H-Pyrrole, 1-(2-furanylmethyl)-                                                       | bread, roasted almond,<br>popcorn, malt, roasted<br>chicken, beer and<br>sandalwood oil | Pyrrole  | 13.506 | 3.05                           | 3.24        | 2.66         | <b>4.29</b> | 1.79        |
| 2-Furancarboxaldehyde, 5-<br>(hydroxymethyl)-                                          | warm-herbaceous,<br>winey-ethereal,<br>hungarian chamomile,<br>tobacco                  | Furans   | 15.297 | 3.59                           | 4.58        | 5.77         | 5.23        | <b>6.62</b> |
| 2-Cyclohexen-1-one, 4-(3-hydroxy-1-<br>butenyl)-3,5,5-trimethyl-, [R-[R*,R*-<br>(E)]]- | tobacco and tobacco<br>smoke                                                            | Ketones  | 16.108 | 0.49                           | 0.86        | 0.98         | 1.20        | <b>1.21</b> |
| 2-Isoamyl-6-methylpyrazine                                                             | sour                                                                                    | Pyrazine | 16.232 | 0.00                           | <b>3.89</b> | 1.97         | 0.00        | 1.21        |
| 10-Hydroxydecanoic acid                                                                | honey                                                                                   | Acid     | 17.357 | 0.00                           | 0.00        | <b>1.68</b>  | 0.00        | 0.00        |
| Nonanoic acid                                                                          | coconut                                                                                 | Acid     | 17.657 | 0.86                           | <b>0.92</b> | 0.21         | 0.51        | 0.10        |
| 4-Vinylguaiacol                                                                        | clove, spicy                                                                            | Phenols  | 18.890 | 17.13                          | 17.44       | <b>18.57</b> | 13.36       | 9.71        |
| Limonen-6-ol, pivalate                                                                 | sweet, orange, citrus                                                                   | Terpene  | 19.305 | 0.00                           | 0.00        | <b>0.37</b>  | 0.00        | 0.13        |
| Tetradecane, 2,6,10-trimethyl-                                                         | fatty, dairy, coconut                                                                   | Esters   | 19.448 | 0.00                           | 0.00        | <b>0.37</b>  | 0.00        | 0.32        |
| Geranyl isovalerate                                                                    | floral, fruity, apple                                                                   | Phenols  | 19.880 | 1.74                           | 0.00        | 1.62         | 0.15        | <b>2.15</b> |

**Table S2.** Volatile compounds in roasted coffee beans (continued)

| Compound                                           | Aroma                                        | Group     | rt     | Total peak area percentage (%) |             |             |       |      |
|----------------------------------------------------|----------------------------------------------|-----------|--------|--------------------------------|-------------|-------------|-------|------|
|                                                    |                                              |           |        | OC                             | C           | LP          | PM+LP | PM   |
| $\alpha$ -Furfuryliden- $\alpha$ -furylmethylamine | coffee-like, burnt<br>aroma, sweet and spicy | Furans    | 22.963 | 1.51                           | 2.15        | <b>7.51</b> | 6.82  | 5.74 |
| 5-Methyl-2-phenyl-2-hexenal                        | cocoa, chocolate                             | Aldehydes | 26.058 | 0.00                           | 0.62        | <b>0.67</b> | 0.00  | 0.58 |
| Megastigmatrienone                                 | tobacco                                      | Phenols   | 29.451 | 0.13                           | 0.13        | <b>0.16</b> | 0.13  | 0.00 |
| Hexadecane                                         | gasoline                                     | Alkane    | 30.327 | 0.15                           | <b>0.24</b> | 0.20        | 0.21  | 0.14 |

ordinary coffee (OC), control or non-fermentation (C; uninoculation), *P. motobuensis* JT-A29 (PM), *L. plantarum* JT-PN39 (LP) and mixed starter cultures (PM+LP) fermented coffee.
